# Supplementary material for: Determinants of climbing energetic costs in humans
Source: Oxford University Press journal article supplement (doi:10.1242/jeb.234567), 2021-06-23
Supplement: jeb234567supp.pdf [file jeb234567supp.pdf]

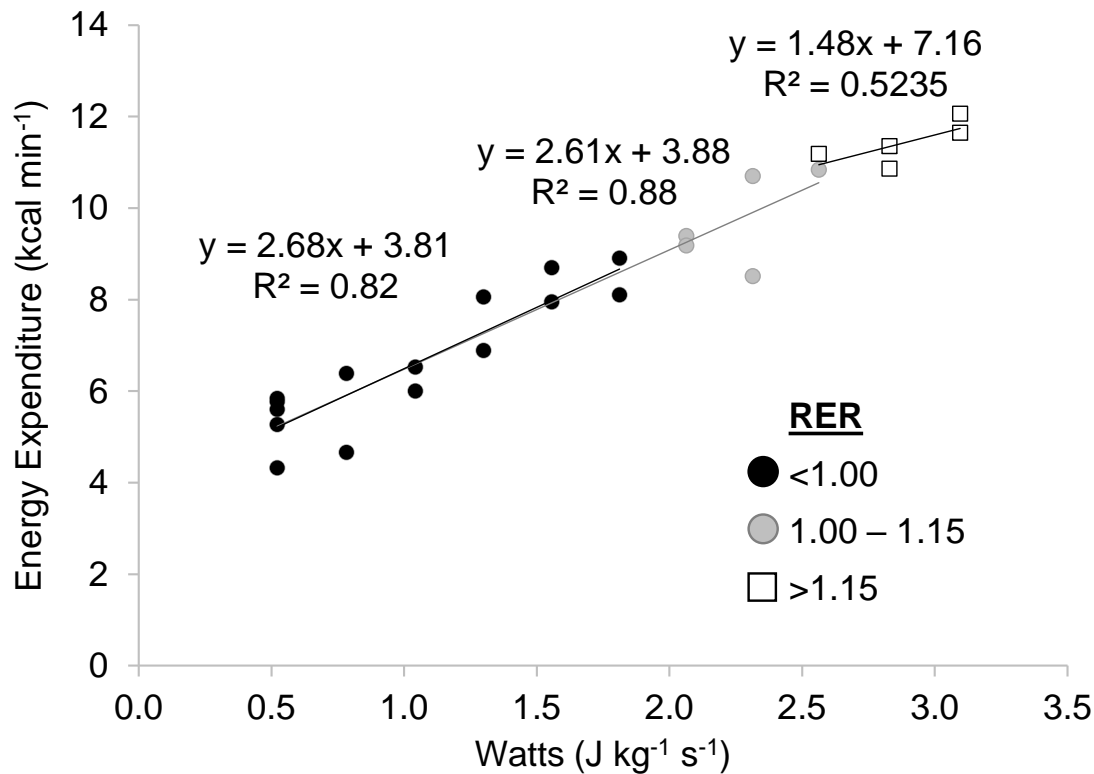

**Fig. S1. Energy expenditure as a function of work.** Energy expenditure, calculated from  $\text{VO}_2$  and  $\text{VCO}_2$  using the Weir equation, plotted against workload for a human subject in a graded exercise test reported in Table 3 of Evardsen et al. 2014. The subject maintained a constant running speed (4.8 kph) while the incline of the treadmill increased from 4% to 20%. Once the treadmill reached 20%, speed was further increased to 5.3 kph and then to 5.8 kph. Workload (Watts) reflects the rate of ascent,  $\text{speed} \times \sin\theta$ , where  $\theta$  is treadmill incline angle. The first minute of the test is excluded from this analysis. As can be seen from the plot, energy expenditure continues to track workload above RER=1.00, up to RER=1.15.

Table S1

[Click here to download Table S1](#)

**Table S2. Tested COL<sub>net</sub> linear mixed effect models.** Selected model is bolded.

| Model                                                                    | R <sup>2</sup> <sub>m</sub> | R <sup>2</sup> <sub>c</sub> | AIC        |
|--------------------------------------------------------------------------|-----------------------------|-----------------------------|------------|
| <b>lmer (COL<sub>net</sub> ~ velocity + (1   subject))</b>               | <b>0.52</b>                 | <b>0.86</b>                 | <b>187</b> |
| lmer (COL <sub>net</sub> ~ t <sub>c</sub> <sup>-1</sup> + (1   subject)) | 0.29                        | 0.59                        | 232        |
| lmer (COL <sub>net</sub> ~ velocity + mass + (1   subject))              | 0.53                        | 0.86                        | 192        |
| lmer (COL <sub>net</sub> ~ velocity + imi + (1   subject))               | 0.52                        | 0.86                        | 180        |
| lmer (COL <sub>net</sub> ~ velocity + arm + (1   subject))               | 0.54                        | 0.86                        | 189        |
| lmer (COL <sub>net</sub> ~ velocity + height + (1   subject))            | 0.53                        | 0.86                        | 192        |
| lmer (COL <sub>net</sub> ~ velocity + difficulty + (1   subject))        | 0.54                        | 0.86                        | 188        |
| lmer (COL <sub>net</sub> ~ velocity + experience + (1   subject))        | 0.51                        | 0.86                        | 188        |

**Table S3. Correlation tests between velocity and potential explanatory variables of COL<sub>net</sub>.**

| Variable             | Type of test | Correlation coefficient | Significance       |
|----------------------|--------------|-------------------------|--------------------|
| Experience           | Spearman's   | $\rho = -0.08$          | p = 0.54           |
| Difficulty           | Spearman's   | $\rho = -0.51$          | <b>p &lt; 0.01</b> |
| Inverse contact time | Pearson's    | r = 0.73                | <b>p &lt; 0.01</b> |
| Body mass            | Spearman's   | $\rho = 0.05$           | p = 0.70           |
| Arm length           | Spearman's   | $\rho = 0.02$           | p = 0.91           |
| Height               | Spearman's   | $\rho < 0.01$           | p = 0.95           |
| IMI                  | Spearman's   | $\rho = 0.29$           | p = 0.08           |
